# Supplementary material
Source: PubMed Central journal article supplement (PMC7185777)
Supplement: mmc1.pdf [file mmc1.pdf]

## Supplementary Table 2

Backgrounds of references IBV strains used in this study.

| Strain     | country     | year | Genotype/lineage | GenBank accession number |
|------------|-------------|------|------------------|--------------------------|
| Gray       | USA         | 1962 | GI-3             | L14069                   |
| JMK        | USA         | 1964 | GI-3             | L14070                   |
| L613       | USA         | 1965 | GI-8             | JQ964066                 |
| SE17       | USA         | 1991 | GI-8             | M99484                   |
| Holte      | USA         | 1954 | GI-2             | GU393336                 |
| SDW        | China       | 2004 | GI-2             | DQ070840                 |
| Ark DPI    | USA         | 1981 | GI-9             | AF006624                 |
| CAL99      | USA         | 1999 | GI-9             | DQ912831                 |
| Qu16       | Canada      | 1996 | GI-20            | AF349620                 |
| Qu mv      | Canada      | 1999 | GI-20            | AF349621                 |
| GX2-98     | China       | 1998 | GI-4             | AY251816                 |
| Holte      | USA         | 1962 | GI-4             | L18988                   |
| K87        | New Zealand | 1998 | GI-10            | AF151959                 |
| T6         | New Zealand | 1998 | GI-10            | AF151960                 |
| J9         | China       |      | GI-6             | DQ515802                 |
| Vic S      | Australia   | 1962 | GI-6             | U29519                   |
| N1/62      | Australia   | 1962 | GI-5             | U29522                   |
| V2-02      | Australia   | 2002 | GI-5             | DQ490215                 |
| 53XJ-99II  | China       | 1999 | GI-18            | KC577391                 |
| JP8127     | Japan       | 1993 | GI-18            | AY296744                 |
| K210-02    | Korea       | 2002 | GI-15            | AY257068                 |
| K620/02    | Korea       | 2002 | GI-15            | FJ807944                 |
| AL/6609/98 | USA         | 1998 | GI-17            | AF510656                 |

---

|                     |                 |      |       |          |
|---------------------|-----------------|------|-------|----------|
| CV-56b              | USA             | 1991 | GI-17 | AF027509 |
| GA/12341/2012       | USA             | 2012 | GI-27 | KM660634 |
| Georgia 08          | USA             | 2008 | GI-27 | GU301925 |
| IBV/Brasil/351/1984 | Brazil          | 1984 | GI-11 | GU393339 |
| UFMG/1141           | Brazil          | 2009 | GI-11 | JX182783 |
| D207                | The Netherlands | 1979 | GI-12 | M21969   |
| D274                | The Netherlands | 1979 | GI-12 | X15832   |
| CK/CH/LDL/97I       | China           | 1997 | GI-16 | EF030995 |
| Q1                  | China           | 1996 | GI-16 | AF286302 |
| IS/1494/06          | Israel          | 2006 | GI-23 | EU780077 |
| variant 2           | Israel          |      | GI-23 | AF093796 |
| H120                | The Netherlands | 1960 | GI-1  | FJ888351 |
| M41                 | USA             | 1956 | GI-1  | AY561711 |
| IBV506              | India           | 2013 | GI-24 | KF809796 |
| V13                 | India           | 1998 | GI-24 | KF757447 |
| GA/10216/2010       | USA             | 2010 | GI-25 | KM660636 |
| GA/12274/2012       | USA             | 2012 | GI-25 | KP085595 |
| GX-G                | China           | 1988 | GI-7  | JQ764816 |
| TP/64               | China           | 1964 | GI-7  | AY606320 |
| CK/CH/LSC/99I       | China           | 1999 | GI-22 | DQ167147 |
| HN08                | China           | 2008 | GI-22 | GQ265940 |
| I0114/14            | China           | 2014 | GI-29 | KY407556 |
| I0118/14            | China           | 2014 | GI-29 | KY407558 |
| ck/CH/LGX/111119    | China           | 2011 | GI-28 | KX640829 |
| GX-NN-13            | China           | 2011 | GI-28 | JX291989 |
| LX4                 | China           | 1999 | GI-19 | AY189157 |

---

---

|                           |                |      |        |          |
|---------------------------|----------------|------|--------|----------|
| QXIBV                     | China          | 1997 | GI-19  | AF193423 |
| NGA/BP61/2007             | Nigeria        | 2007 | GI-26  | FN182268 |
| NGA/N545/2006             | Nigeria        | 2006 | GI-26  | FN182270 |
| Belgian isolate B1648     | Belgium        | 1984 | GI-14  | X87238   |
| NGA/324/2006              | Nigeria        | 2006 | GI-14  | FN182277 |
| Italy-02                  | Italy          | 1999 | GI-21  | AJ457137 |
| Spain/98/313              | Spain          | 1998 | GI-21  | DQ064808 |
| Moroccan-G/83             | Morocco        | 1983 | GI-13  | EU914938 |
| UK/7/91                   | United Kingdom | 1991 | GI-13  | Z83975   |
| GX-NN130021               | China          | 2013 | GVII-1 | KM365468 |
| I0636/16                  | China          | 2016 | GVII-1 | MH924835 |
| 018                       | Australia      | 2008 | GV-1   | JX018208 |
| N1/03                     | Australia      | 2003 | GV-1   | FJ235194 |
| N1/88                     | Australia      | 1988 | GIII-1 | U29450   |
| V18/91                    | Australia      | 1991 | GIII-1 | U29521   |
| CK/CH/GX/YL1501-2         | China          | 2015 | GVI-1  | KX107732 |
| CK/CH/HuB/HC1402-1        | China          | 2014 | GVI-1  | KX107753 |
| CK/CH/GX/NN16-11          | China          | 2016 | GVI-1  | MF447733 |
| GX-QZ130064               | China          | 2013 | GVI-1  | KJ999801 |
| GX-QZ130065               | China          | 2013 | GVI-1  | KT149876 |
| CK/CH/GD/NC10             | China          | 2010 | GVI-1  | HQ018903 |
| VNUA11                    | Viet Nam       | 2015 | GVI-1  | KY992865 |
| GX-NN120084               | China          | 2012 | GVI-1  | KJ999804 |
| GX-NN120089               | China          | 2012 | GVI-1  | KJ999805 |
| CK/CH/GX/NN16-2           | China          | 2016 | GVI-1  | MF447729 |
| GXNanningHuangdajiu2016.8 | China          | 2016 | GVI-1  | MF375896 |

---

---

|                   |             |      |       |          |
|-------------------|-------------|------|-------|----------|
| CK/CH/GD/XX1412-2 | China       | 2014 | GVI-1 | KX107683 |
| CK/CH/GX/GL1404   | China       | 2014 | GVI-1 | KX107711 |
| CK/CH/GD/XX16-9   | China       | 2016 | GVI-1 | MF447700 |
| CK CH HB HC1104   | China       | 2011 | GVI-1 | KC692310 |
| CK CH GX GL12-1   | China       | 2012 | GVI-1 | KC692273 |
| CK/CH/GX/GL12-4   | China       | 2012 | GVI-1 | KJ524635 |
| CK/CH/GX/GL1511   | China       | 2015 | GVI-1 | KX107715 |
| CK/CH/GX/NN11-4   | China       | 2011 | GVI-1 | KJ524602 |
| GX-NN120079       | China       | 2012 | GVI-1 | KJ999803 |
| CK CH GD YX1101   | China       | 2011 | GVI-1 | KC692282 |
| CK/CH/HB/2016     | China       | 2016 | GVI-1 | MF882923 |
| CK/CH/GX/GL16-2   | China       | 2016 | GVI-1 | MF447745 |
| CK/CH/GX/LC17-5   | China       | 2017 | GVI-1 | MG734765 |
| GX-NN09032        | China       | 2009 | GVI-1 | JX292013 |
| CK/CH/SD09/005    | China       | 2009 | GVI-1 | HM230749 |
| CK/CH/GD/KP10     | China       | 2010 | GVI-1 | HQ018919 |
| CK/CH/2014/QL1403 | China       | 2014 | GVI-1 | KU361198 |
| TC07-2            | China       | 2007 | GVI-1 | GQ265948 |
| ck/CH/IBTZ2012    | China       | 2012 | GVI-1 | KF663559 |
| SDIB781/2012      | China       | 2012 | GVI-1 | KF007209 |
| K26/10            | South Korea | 2010 | GVI-1 | JF804678 |
| K273/09           | South Korea | 2009 | GVI-1 | JF804687 |
| KrD1515           | South Korea | 2015 | GVI-1 | MF176212 |
| CK CH HN1005      | China       | 2010 | GVI-1 | KC692307 |
| K308/09           | South Korea | 2009 | GVI-1 | JF804689 |
| K23/10            | South Korea | 2010 | GVI-1 | JF804677 |

---

---

|            |                 |      |       |          |
|------------|-----------------|------|-------|----------|
| K46/10     | South Korea     | 2010 | GVI-1 | JF804679 |
| K119/09    | South Korea     | 2009 | GVI-1 | JF804680 |
| AR/6386/97 | USA             | 1997 | GIV-1 | AF274436 |
| DE/072/92  | USA             | 1992 | GIV-1 | U77298   |
| D1466      | The Netherlands | 1979 | GII-1 | M21971   |
| V1397      | The Netherlands | 1984 | GII-1 | M21968   |

---

Supplementary Table 2

Putative genes/genomic regions of viruses of GVI-1 lineage<sup>a</sup>.

| Strain                | 5'             | Gene 1               |                      | S                     | Gene 3               |                      |                      | M                    | Gene 5               |                      | N                     | 3' UTR               |
|-----------------------|----------------|----------------------|----------------------|-----------------------|----------------------|----------------------|----------------------|----------------------|----------------------|----------------------|-----------------------|----------------------|
|                       | UTR            | ORF1a                | ORF1ab               |                       | 3a                   | 3b                   | 3c                   |                      | 5a                   | 5b                   |                       |                      |
| LHB/110615            | 1-525<br>(525) | 526-12384<br>(11859) | 526-20417<br>(19892) | 20368-23883<br>(3516) | 23883-24056<br>(174) | 24056-24244<br>(189) | 24225-24536<br>(312) | 24526-25206<br>(681) | 25567-25764<br>(198) | 25761-26009<br>(249) | 25952-27169<br>(1218) | 27170-27673<br>(504) |
| LHB/110617            | 1-525<br>(525) | 526-12384<br>(11859) | 526-20417<br>(19892) | 20368-23883<br>(3516) | 23883-24056<br>(174) | 24056-24244<br>(189) | 24225-24536<br>(312) | 24526-25206<br>(681) | 25567-25764<br>(198) | 25761-26009<br>(249) | 25952-27169<br>(1218) | 27170-27673<br>(504) |
| I0916/16              | 1-525<br>(525) | 526-12387<br>(11862) | 526-20420<br>(19895) | 20371-23883<br>(3513) | 23883-24056<br>(174) | 24056-24244<br>(189) | 24225-24536<br>(312) | 24526-25206<br>(681) | 25568-25765<br>(198) | 25762-26010<br>(249) | 25953-27179<br>(1227) | 27180-27683<br>(504) |
| I1209/16              | 1-528<br>(528) | 529-12354<br>(11826) | 529-20387<br>(19859) | 20338-23853<br>(3516) | 23853-24026<br>(174) | 24026-24214<br>(189) | 24198-24506<br>(309) | 24496-25176<br>(681) | 25530-25727<br>(198) | 25724-25996<br>(273) | 25915-27144<br>(1230) | 27145-27648<br>(504) |
| I0221/17              | 1-525<br>(525) | 526-12387<br>(11862) | 526-20420<br>(19895) | 20371-23886<br>(3516) | 23886-23984<br>(99)  | 23984-24172<br>(189) | 24156-24464<br>(309) | 24454-25134<br>(681) | 25488-25685<br>(198) | 25682-25930<br>(249) | 25873-27102<br>(1230) | 27103-27606<br>(504) |
| I0725/17              | 1-525<br>(525) | 526-12381<br>(11856) | 526-20426<br>(19901) | 20377-23892<br>(3516) | 23892-24065<br>(174) | 24065-24253<br>(189) | 24234-24545<br>(312) | 24535-25215<br>(681) | 25578-25775<br>(198) | 25772-26020<br>(249) | 25963-27192<br>(1230) | 27193-27696<br>(504) |
| CK/CH/2014/<br>QL1403 | 1-525<br>(525) | 526-12375<br>(11850) | 526-20408<br>(19883) | 20359-23874<br>(3516) | 23874-24047<br>(174) | 24047-24235<br>(189) | 24219-24527<br>(309) | 24517-25197<br>(681) | 25561-25758<br>(198) | 25755-26003<br>(249) | 25946-27175<br>(1230) | 27176-27679<br>(504) |
| CK/CH/HB/2<br>016     | 1-525<br>(525) | 526-12387<br>(11862) | 526-20420<br>(19895) | 20371-23883<br>(3513) | 23883-24056<br>(174) | 24056-24244<br>(189) | 24225-24536<br>(312) | 24526-25206<br>(681) | 25570-25767<br>(198) | 25764-26012<br>(249) | 25955-27181<br>(1227) | 27182-27685<br>(504) |
| ck/CH/IBTZ/<br>2012   | 1-525<br>(525) | 526-12387<br>(11862) | 526-20420<br>(19895) | 20371-23886<br>(3516) | 23886-24059<br>(174) | 24059-24247<br>(189) | 24228-24539<br>(312) | 24529-25209<br>(681) | 25572-25769<br>(198) | 25766-26014<br>(249) | 25957-27186<br>(1230) | 27187-27690<br>(504) |
| CK/CH/SD09<br>/005    | 1-525<br>(525) | 526-12387<br>(11862) | 526-20420<br>(19895) | 20371-23886<br>(3516) | 23886-24059<br>(174) | 24059-24247<br>(189) | 24231-24539<br>(309) | 24529-25209<br>(681) | 25572-25769<br>(198) | 25766-26014<br>(249) | 25957-27186<br>(1230) | 27187-27691<br>(505) |
| GX-NN0903<br>2        | 1-525<br>(525) | 526-12387<br>(11862) | 526-20423<br>(19898) | 20374-23889<br>(3516) | 23889-24062<br>(174) | 24062-24250<br>(189) | 24234-24542<br>(309) | 24532-25212<br>(681) | 25575-25772<br>(198) | 25769-26017<br>(249) | 25960-27189<br>(1230) | 27190-27672<br>(483) |

<sup>a</sup> Sizes of the putative genes/genomic regions are shown in parentheses. IBV, infectious bronchitis virus; M, membrane protein; N, nucleocapsid protein; ORF, open reading frame; S, spike protein; UTR, untranslated region.
